# Supplementary material for: In actio optophysiological analyses reveal functional diversification of dopaminergic neurons in the nematode C. elegans
Source: PubMed Central journal article supplement (PMC4872038; doi:10.1038/srep26297), 2016-05-19
Supplement: srep26297-s1.pdf [file srep26297-s1.pdf]

## **Supplementary information**

### **Title:**

***In actio* optophysiological analyses reveal functional diversification of dopaminergic neurons in the nematode *C. elegans***

**Authors:** Yuki Tanimoto<sup>1\*</sup>, Ying Grace Zheng<sup>1\*</sup>, Xianfeng Fei<sup>2</sup>, Yukako Fujie<sup>1</sup>, Koichi Hashimoto<sup>3</sup>, Koutarou D. Kimura<sup>1</sup>

### **Items:**

Supplementary Figure S1

Supplementary Table S1 - S4

Supplementary Video S1 - S3

## Wild-type, well-fed, PDE

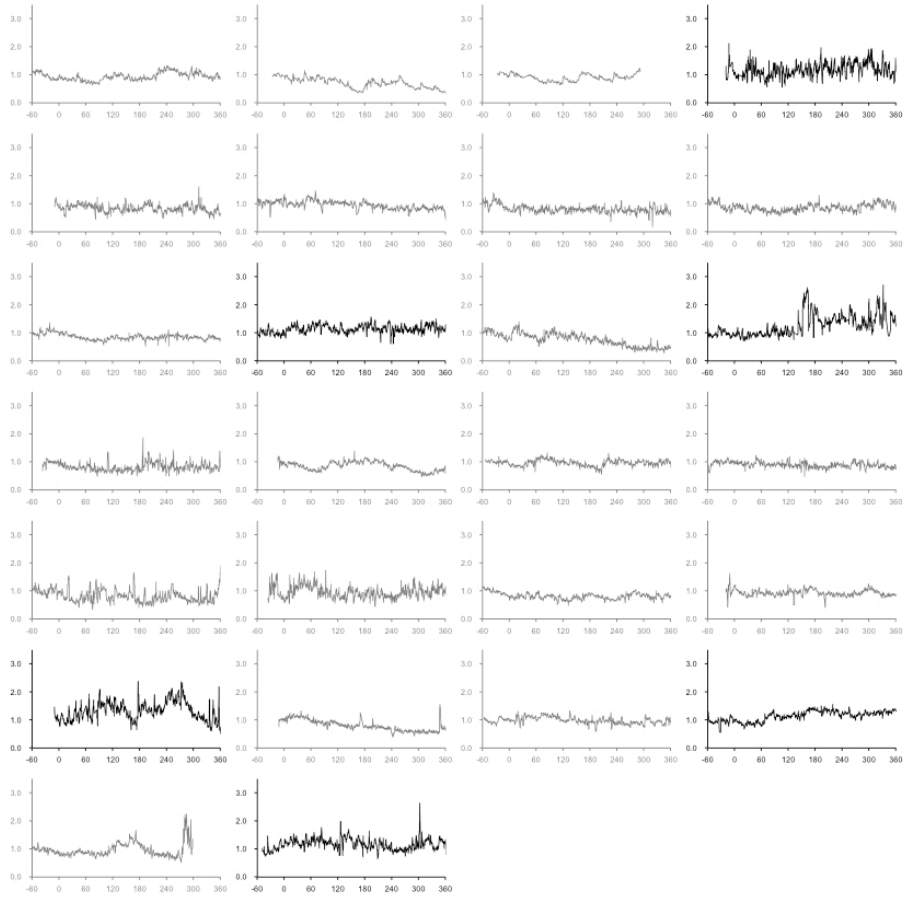

## *trp-4(sy695)*, well-fed, CEPD

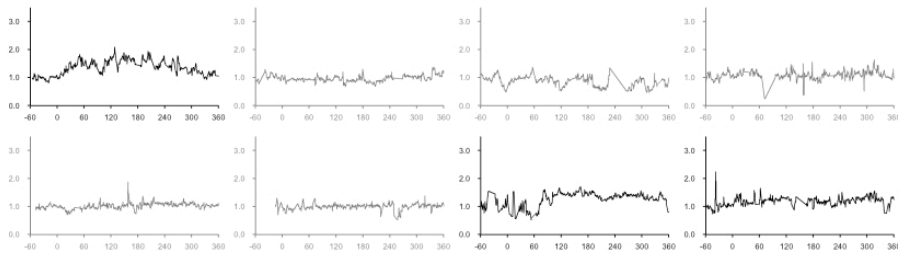

## *trp-4(sy695)*, well-fed, CEPV

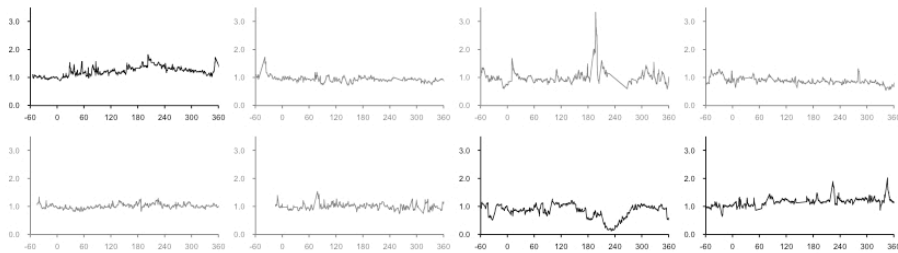

**Figure S1. Individual calcium responses of PDE pair from well-fed wild-type animals and CEPD and CEPV neuron pairs from well-fed *trp-4* animals.** When the average  $R/R_0$  after  $t = 0$  was  $<1.1$  in PDE or in both of CEPD and CEPV in an animal, the animal was regarded as "not responding" one and the data is shown in grey. Similarly to Fig. 3, the time when an animal entered a bacterial lawn was determined as  $t = 0$ .

**Supplementary Table S1. Numbers of synaptic connections from CEP neurons to target neurons.**

| Targeted neuron | CEPDL | CEPDR | CEPVL | CEPVR | Targeting CEP |
|-----------------|-------|-------|-------|-------|---------------|
| ADLR            |       |       |       | 2     | single        |
| AFDL            | 1     |       |       |       | single        |
| AINL            | 1     |       |       |       | single        |
| ALML            | 2     |       |       |       | single        |
| ASGR            |       |       |       | 2     | single        |
| AVEL            |       | 6     |       | 7     | DV            |
| AVER            | 8     |       | 3     |       | DV            |
| BDUR            |       | 3     |       |       | single        |
| CEPDR           | 1     | 3     |       | 1     | DV and LR     |
| CEPshVL         |       |       | 1     |       | single        |
| CEPshVR         |       |       |       | 2     | single        |
| IL1R            |       | 1     |       |       | single        |
| IL1DL           | 6     |       |       |       | single        |
| IL1DR           |       | 7     |       |       | single        |
| IL1VL           |       |       | 2     |       | single        |
| IL1VR           |       |       |       | 4     | single        |
| IL2DL           | 1     |       |       |       | single        |
| IL2VR           |       |       |       | 1     | single        |
| OLLL            | 4     |       | 3     |       | DV            |
| OLLR            |       | 7     |       | 8     | DV            |
| OLQDL           | 8     |       |       |       | single        |
| OLQDR           |       | 9     |       |       | single        |
| OLQVL           |       |       | 5     |       | single        |
| OLQVR           |       |       |       | 6     | single        |
| PVR             |       |       | 1     |       | single        |
| RIAL            |       |       | 1     | 1     | LR            |
| RIAR            |       |       |       | 1     | single        |
| RIBL            | 2     |       | 1     |       | DV            |
| RIBR            |       | 1     |       |       | single        |
| RICL            | 7     | 8     | 6     | 3     | DV and LR     |
| RICR            | 4     | 9     | 4     | 3     | DV and LR     |
| RIFR            |       | 1     |       |       | single        |
| RIH             | 1     | 1     |       |       | LR            |
| RIPL            | 3     |       | 2     |       | DV            |
| RIPR            |       |       |       | 1     | single        |
| RIS             | 2     |       |       |       | single        |
| RIVL            |       |       |       | 1     | single        |
| RMDR            |       | 1     |       |       | single        |
| RMDDL           | 1     |       | 6     |       | DV            |
| RMDDR           |       |       |       | 3     | single        |
| RMDVL           | 9     |       |       |       | single        |
| RMDVR           |       | 2     | 1     |       | DV            |
| RMGL            | 4     |       | 1     |       | DV            |
| RMGR            |       | 1     |       |       | single        |
| RMHL            | 1     | 3     | 3     |       | DV and LR     |
| RMHR            | 6     | 1     | 4     | 4     | DV and LR     |

(continue)

(continued)

| Targeted neuron | CEPDL | CEPDR | CEPVL | CEPVR | Targeting CEP |
|-----------------|-------|-------|-------|-------|---------------|
| SIADR           | 2     |       |       |       | single        |
| SIAVL           |       |       | 1     |       | single        |
| SIAVR           |       |       |       | 4     | single        |
| SIBDR           | 1     |       |       |       | single        |
| SIBVR           |       | 1     |       |       | single        |
| SMBDL           |       | 1     |       |       | single        |
| SMBDR           | 3     |       |       |       | single        |
| SMBVL           |       |       | 1     |       | single        |
| SMBVR           |       |       |       | 1     | single        |
| SMDDR           |       |       |       | 1     | single        |
| SMDVR           |       |       | 1     |       | single        |
| URADL           | 3     |       |       |       | single        |
| URADR           |       | 2     |       |       | single        |
| URAVL           |       |       | 2     |       | single        |
| URAVR           |       |       |       | 2     | single        |
| URBL            | 6     |       |       |       | single        |
| URBR            |       | 7     |       |       | single        |
| URXL            |       |       | 1     |       | single        |
| URXR            |       | 2     |       |       | single        |
| URYDL           | 3     |       |       |       | single        |
| URYDR           |       | 1     |       |       | single        |
| URYVL           |       |       | 3     |       | single        |
| URYVR           |       |       |       | 1     | single        |
| dBWMR3          |       | 3     |       |       | single        |
| dBWML5          | 1     |       |       |       | single        |
| dBWMR5          |       | 2     |       |       | single        |
| vBWMR3          |       |       |       | 1     | single        |
| vBWML5          |       |       | 1     |       | single        |
| vBWMR5          |       |       |       | 2     | single        |
| vBWML7          |       |       | 2     |       | single        |
| vBWMR8          |       |       |       | 2     | single        |
| glial           |       |       | 1     |       | single        |

CEPDL, CEPD-left; CEPDR, CEPD-right; CEPVL, CEPV-left; CEPVR, CEPV-right.

**Supplementary Table S2. Plasmids generated for this study.**

| Plasmid name | Promoter                   | cDNA                           |
|--------------|----------------------------|--------------------------------|
| pYFU207      | <i>dat-1</i> <sup>55</sup> | mCherry <sup>36</sup>          |
| pYFU210      | same as above              | GCaMP6f <sup>35</sup>          |
| pYFU230      | same as above              | ChR2(H134R)::GFP <sup>54</sup> |

**Supplementary Table S3. Transgenic strains used in this study.**

| Fig. no. | strain name | genotype                       | DNA injected                                                                                              |
|----------|-------------|--------------------------------|-----------------------------------------------------------------------------------------------------------|
| Fig. 3   | KDK53204    | <i>N2;oskEx53204</i>           | 45 ng/μl of <i>dat-1p::GCaMP6f</i> (pYFU210)                                                              |
|          | KDK53214    | <i>N2;oskEx53214</i>           | 45 ng/μl of <i>dat-1p::mCherry</i> (pYFU207)                                                              |
|          | KDK53236    | <i>N2;oskEx53236</i>           | 10 ng/μl of <i>lin-44p::mRFP</i> (a gift from Dr. M. Koga)                                                |
|          | KDK53250    | <i>N2;oskEx53250</i>           | 10 ng/μl of PvuII-cut N2 genome as a carrier                                                              |
| Fig. S1  | KDK53289    | <i>trp-4(sy695);oskEx53204</i> | same as above (the extrachromosomal array was transferred from KDK53204 by mating)                        |
| Fig. S1  | KDK53291    | <i>trp-4(sy695);oskEx53236</i> | same as above (the extrachromosomal array was transferred from KDK53236 by mating)                        |
| Fig. S1  | KDK53293    | <i>trp-4(sy695);oskEx53250</i> | same as above (the extrachromosomal array was transferred from KDK53250 by mating)                        |
| Fig. S1  | KDK53295    | <i>trp-4(sy695);oskEx53214</i> | same as above (the extrachromosomal array was transferred from KDK53214 by mating)                        |
| Fig. 4b  | KDK53665    | <i>lite-1(xu7);oskEx53665</i>  | 60 ng/μl of <i>dat-1p::ChR2(H134R)::GFP</i>                                                               |
|          | KDK53715    | <i>lite-1(xu7);oskEx53665</i>  | (pYFU230)<br>20 ng/μl of <i>dat-1p::mCherry</i> (pYFU207)<br>20 ng/μl of PvuII-cut N2 genome as a carrier |

**Supplementary Table S4. Details of the statistical analyses shown in Fig. 4b.**

**Multiple comparison results**

Statistical test: Kruskal-Wallis

Comparison of interest: Normalized locomotion speeds of each condition in the presence of blue light illumination

*P* value: 0.0002

***Post hoc* Steel-Dwass test results with blue light**

| <b>Comparison</b>           | <b><i>P</i> value</b> |
|-----------------------------|-----------------------|
| All (ATR -) vs All (ATR +)  | 0.0019                |
| All (ATR -) vs CEPD (ATR +) | 0.0053                |
| All (ATR -) vs CEPV (ATR +) | 0.2744                |
| All (ATR -) vs PDE (ATR +)  | 0.6299                |

**Two-tailed Mann-Whitney test results with or without blue light**

| <b>Targeted cell type</b> | <b><i>P</i> value</b> |
|---------------------------|-----------------------|
| All (ATR -)               | 0.4307                |
| All (ATR +)               | 0.0043                |
| CEPD (ATR +)              | 0.0185                |
| CEPV (ATR +)              | 0.2150                |
| PDE (ATR +)               | 0.5972                |

### **Supplementary Video Legends**

**Supplementary Video 1.** Tracking of dopaminergic neurons. GCaMP fluorescence (left) and Bright field image (right) are shown. The video speed is 1×.

**Supplementary Video 2.** Off-line optical flow tracking of fluorescent signals from multiple DAergic neuronal cell bodies for calcium imaging.

**Supplementary Video 3.** On-line optical flow tracking of fluorescent signals from multiple dopaminergic neuronal cell bodies for optogenetic stimulation. One of CEP neuron was targeted.
